# Supplementary material
Source: PubMed Central journal article supplement (PMC7305989)
Supplement: NIHMS1567482-supplement-2.pdf [file NIHMS1567482-supplement-2.pdf]

# Supplementary Fig. 1: Uncropped gel source data

Figure 2j

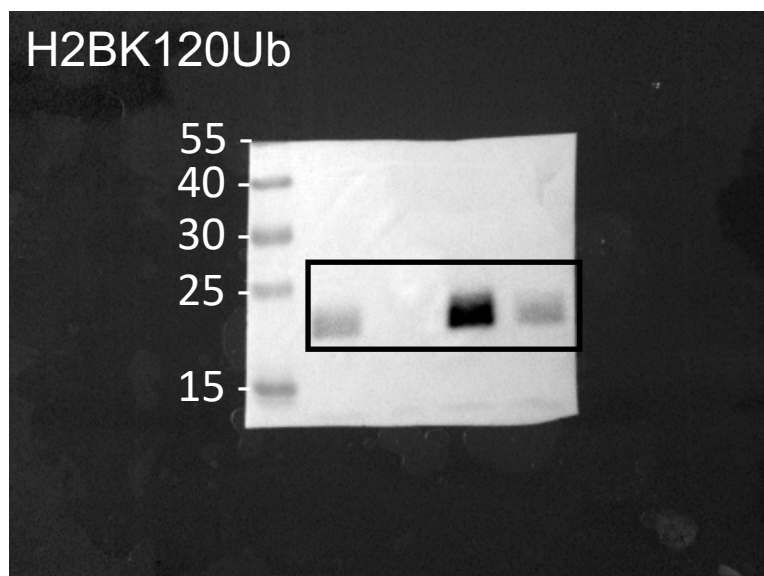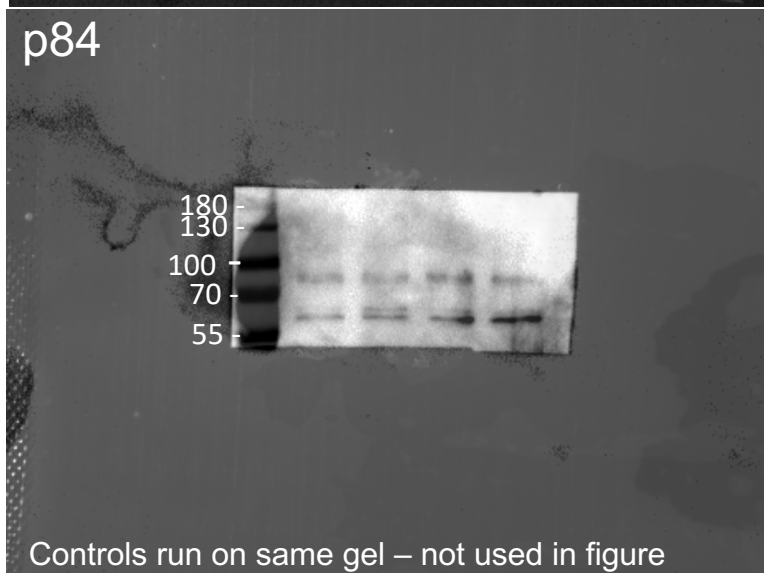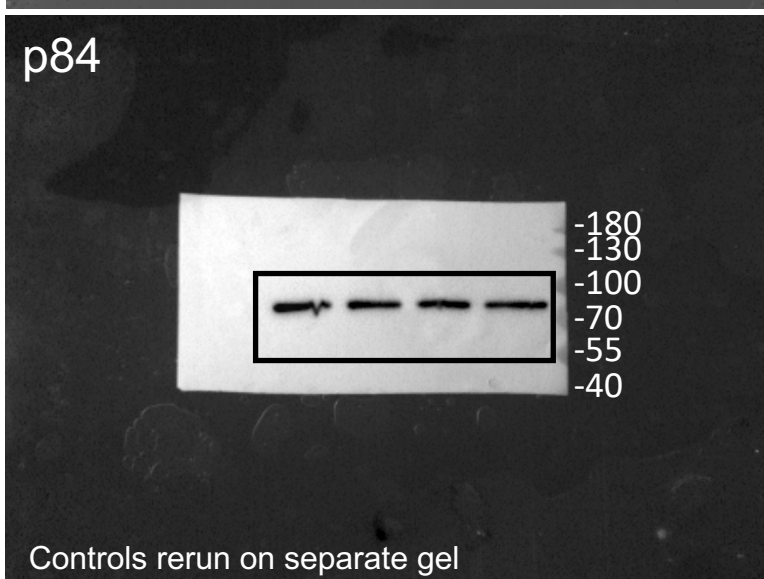

# Extended Data Figure 3b

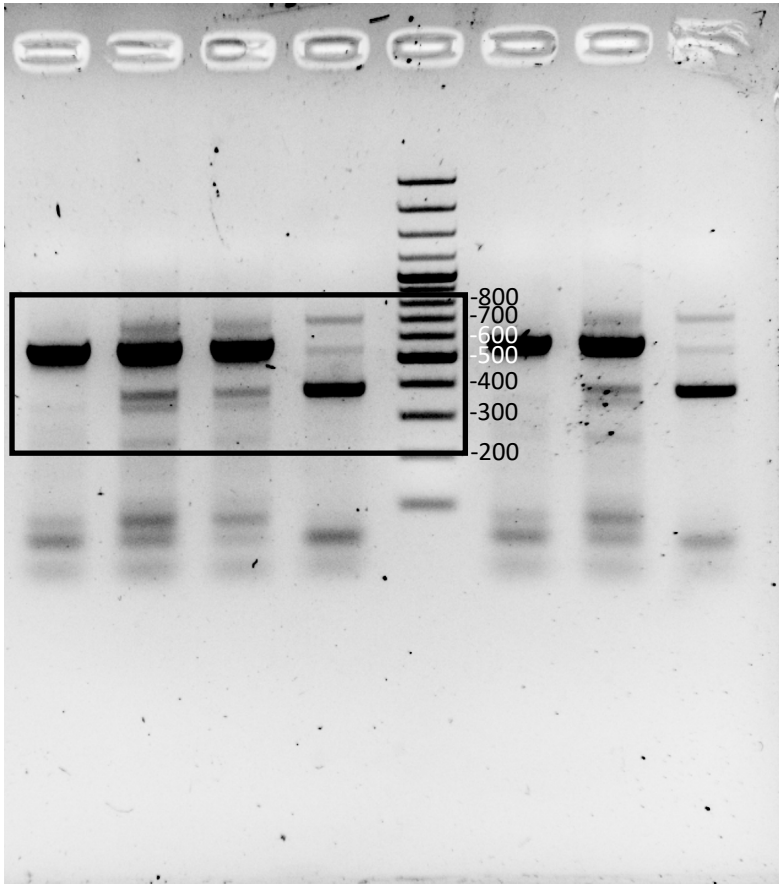

# Extended Data Figure 3c

## Treg Usp22

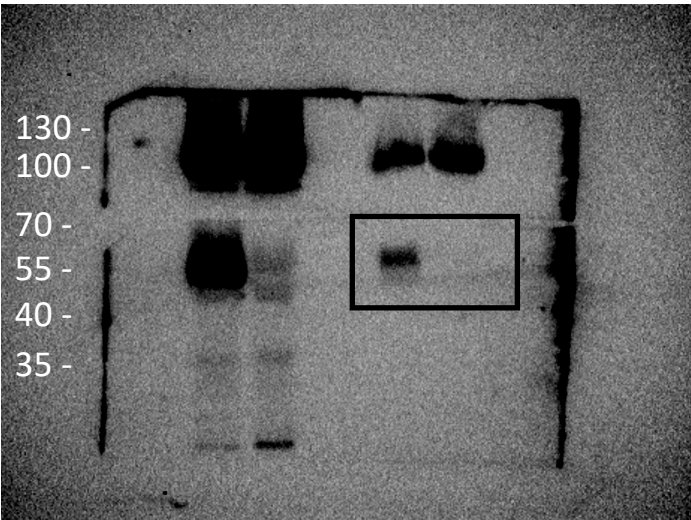

## Tconv Usp22

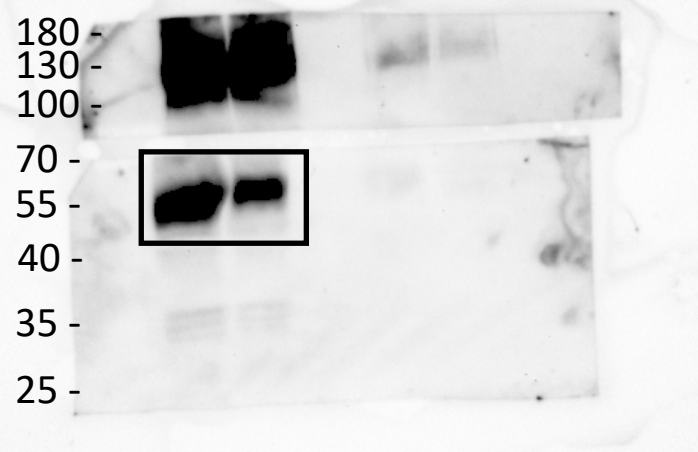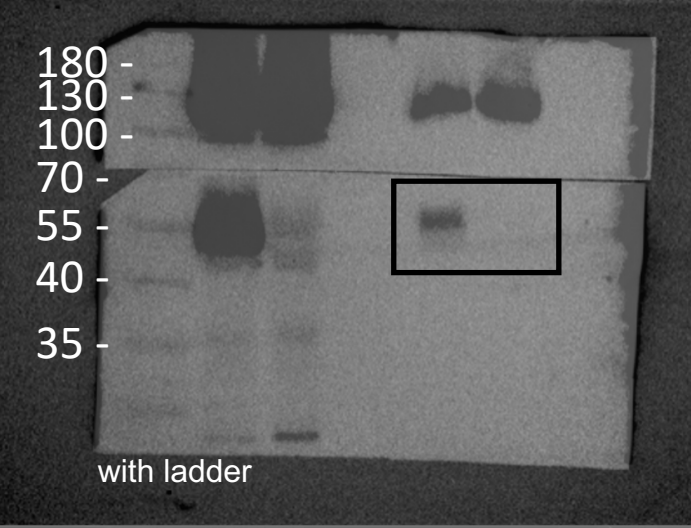

## Tconv Gapdh

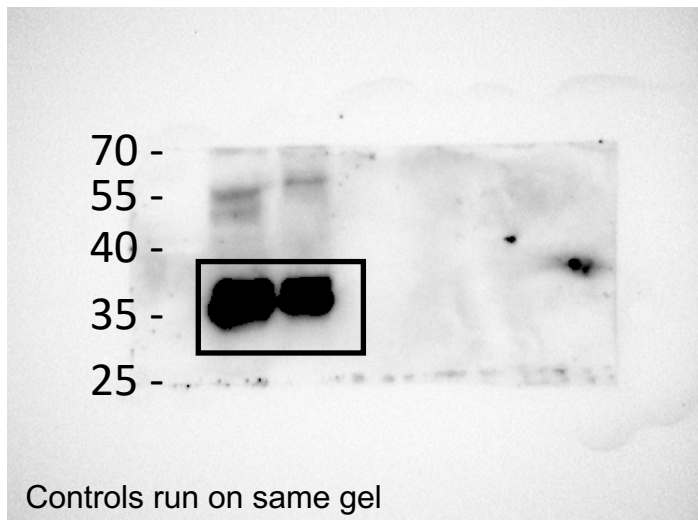

Controls run on same gel

## Treg Gapdh

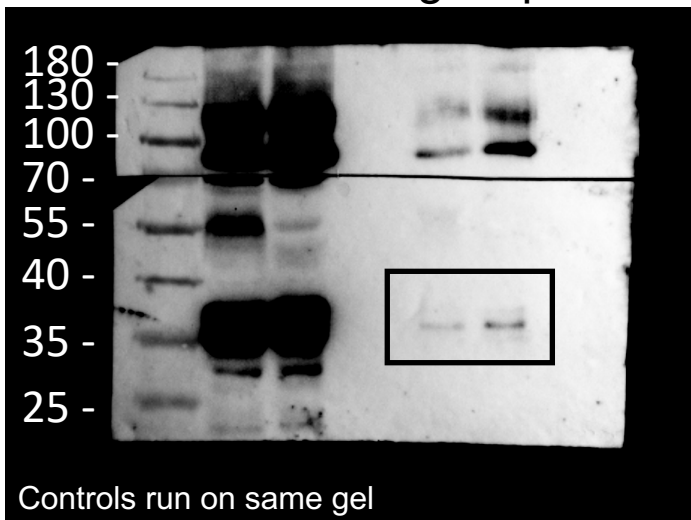

Controls run on same gel

# Extended Data Figure 3e

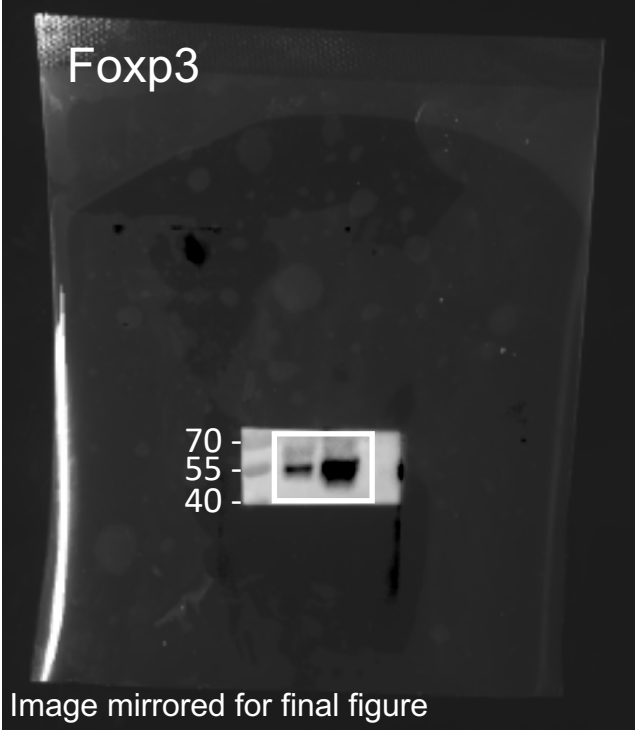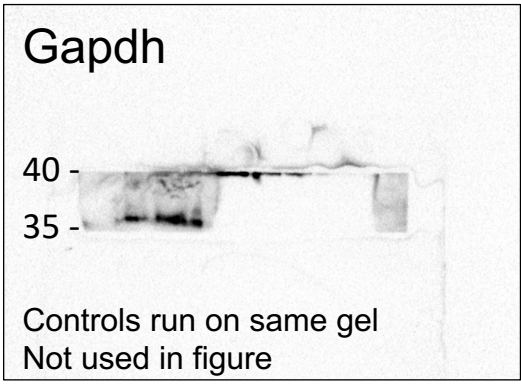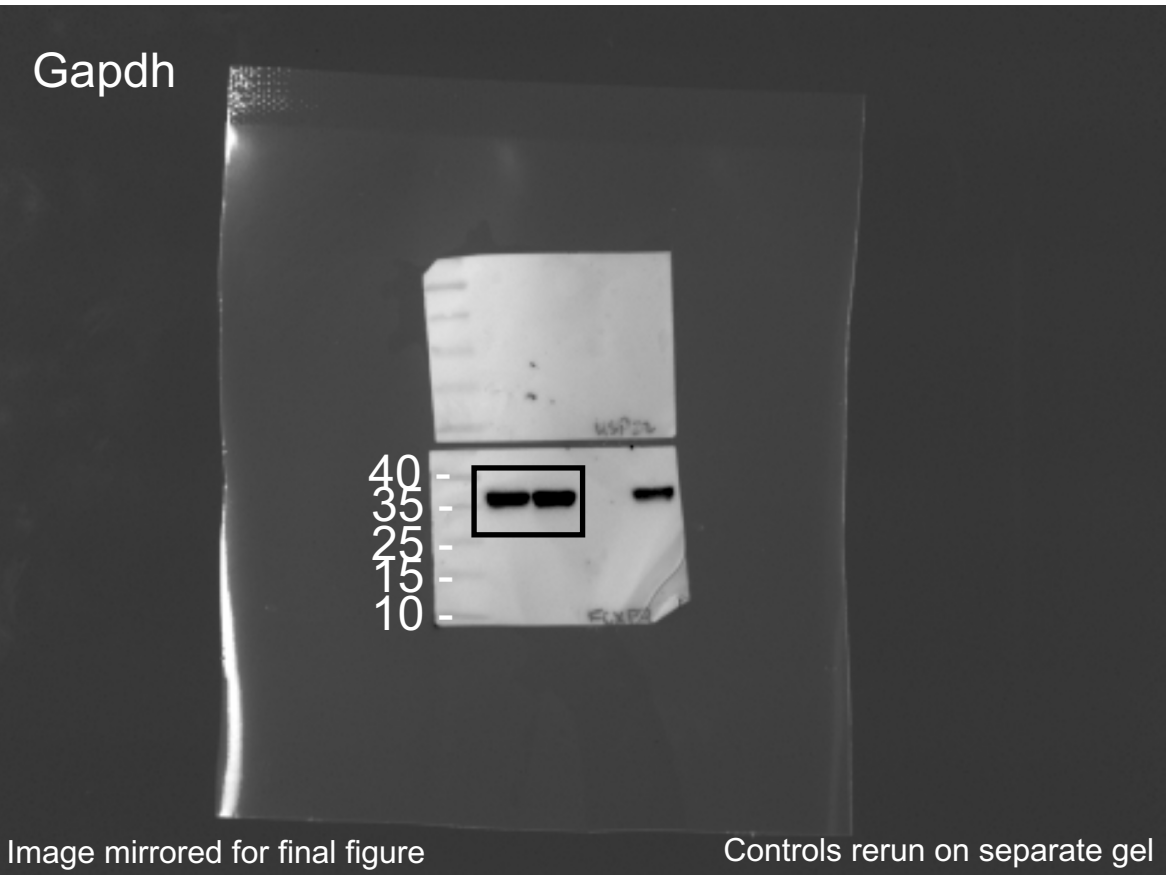

# Extended Data Figure 4a

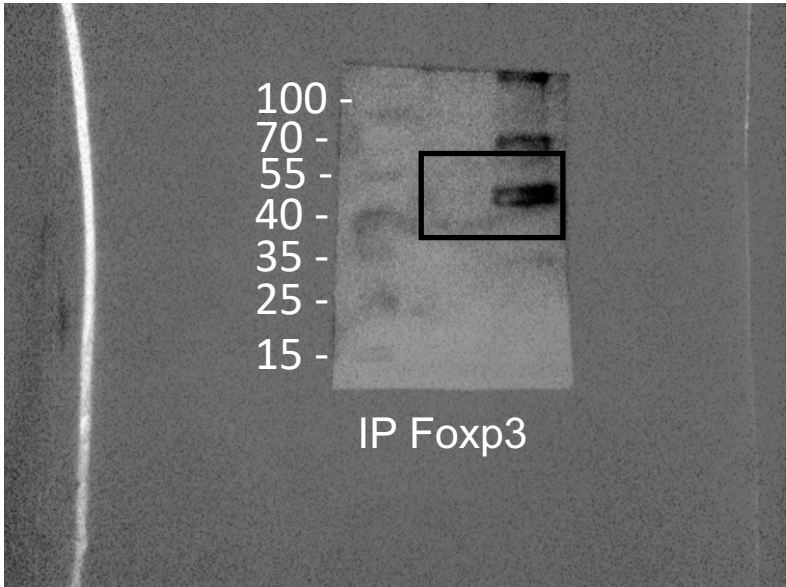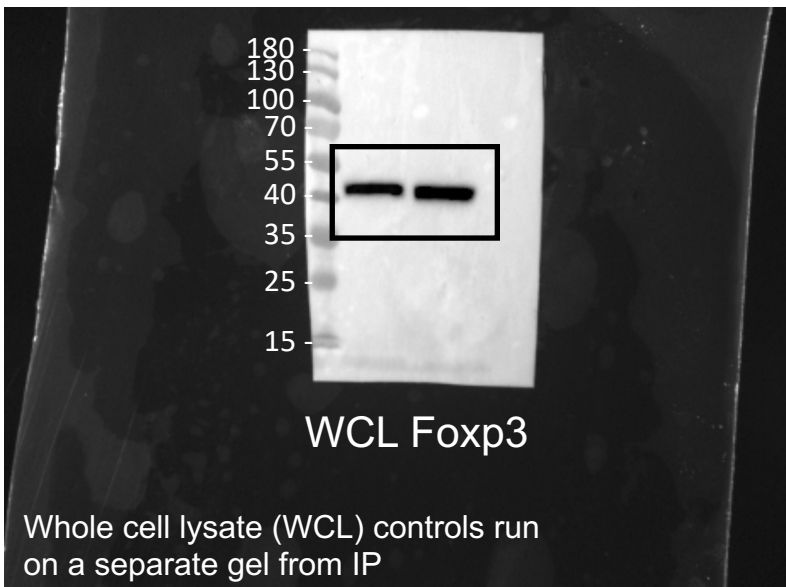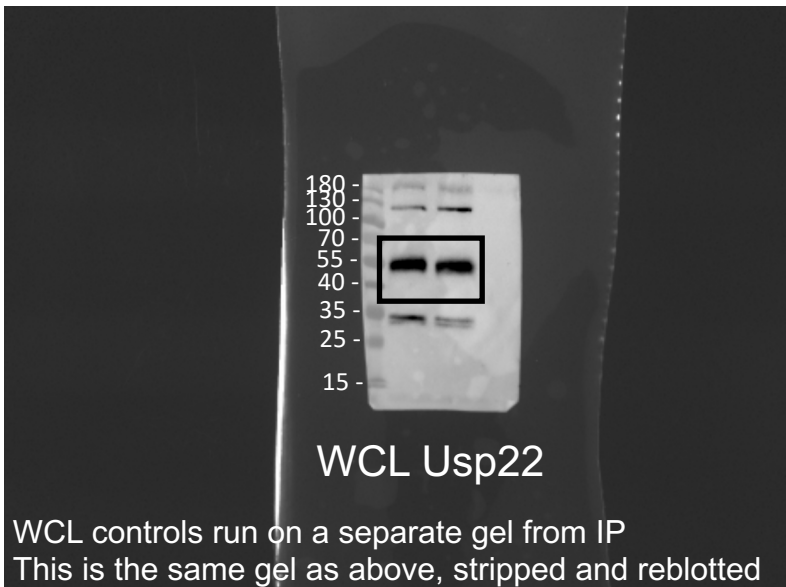

# Extended Data Figure 4b

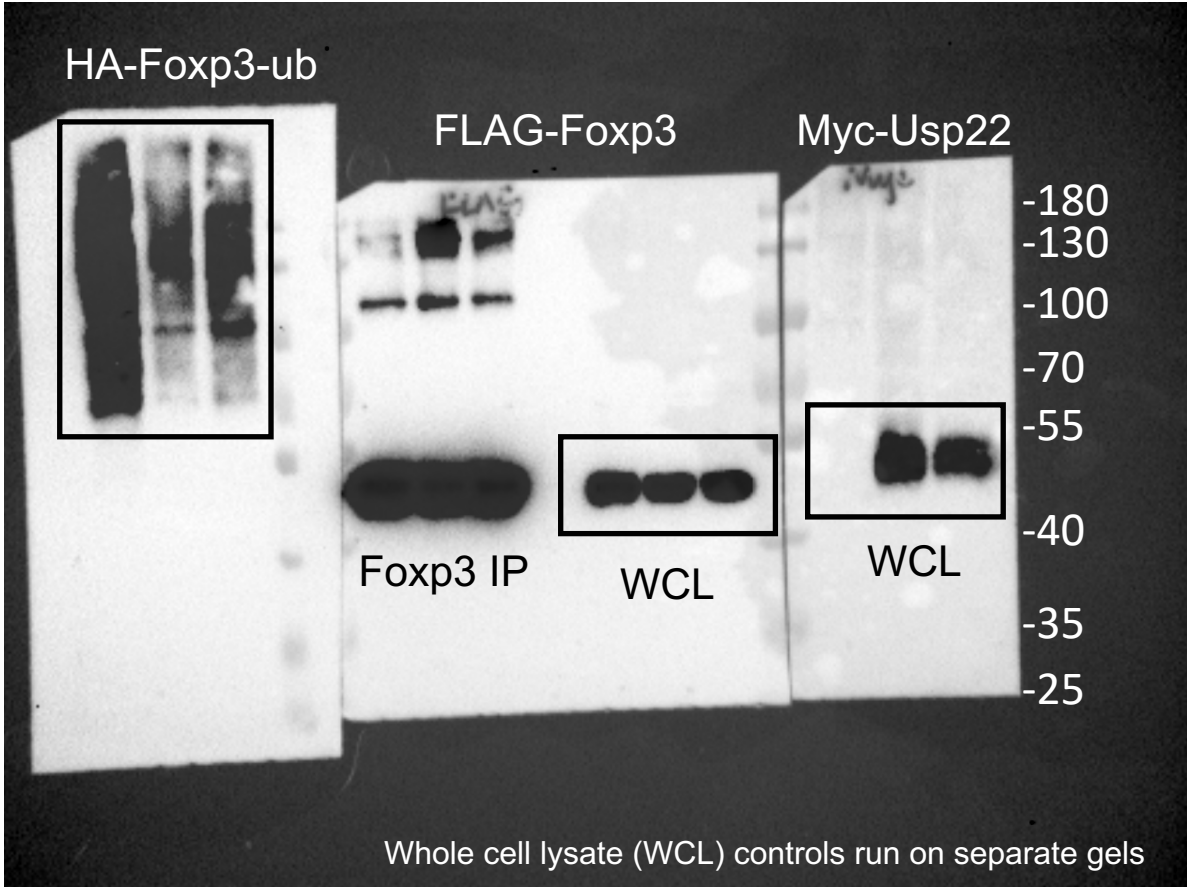

# Extended Data Figure 5g

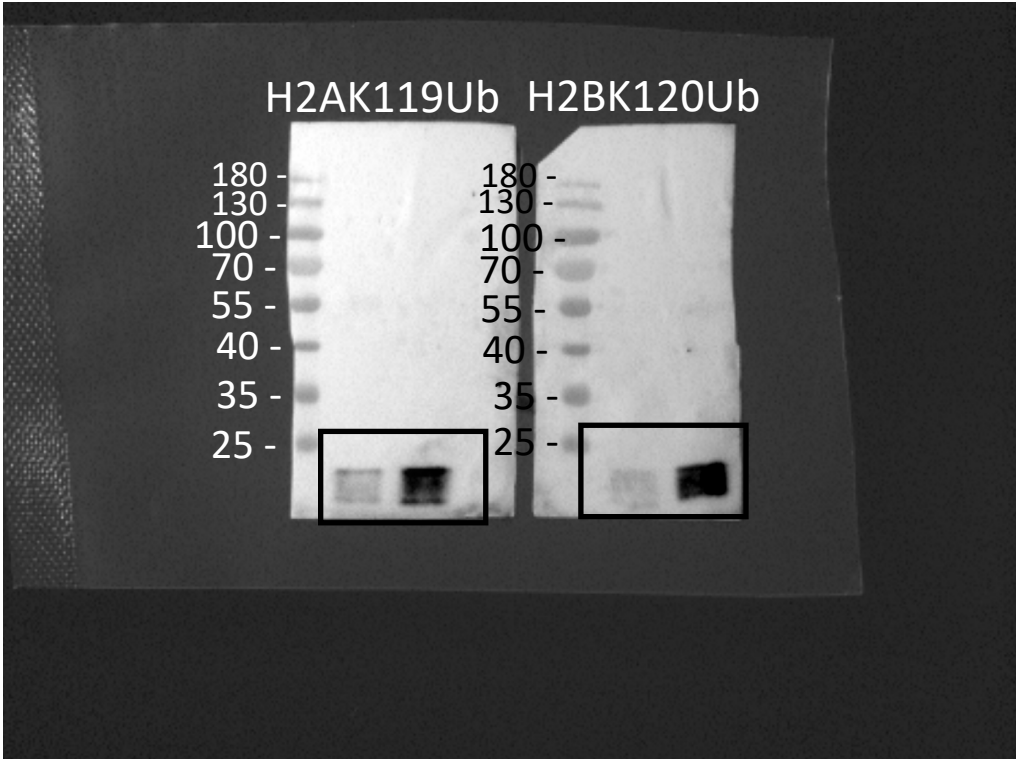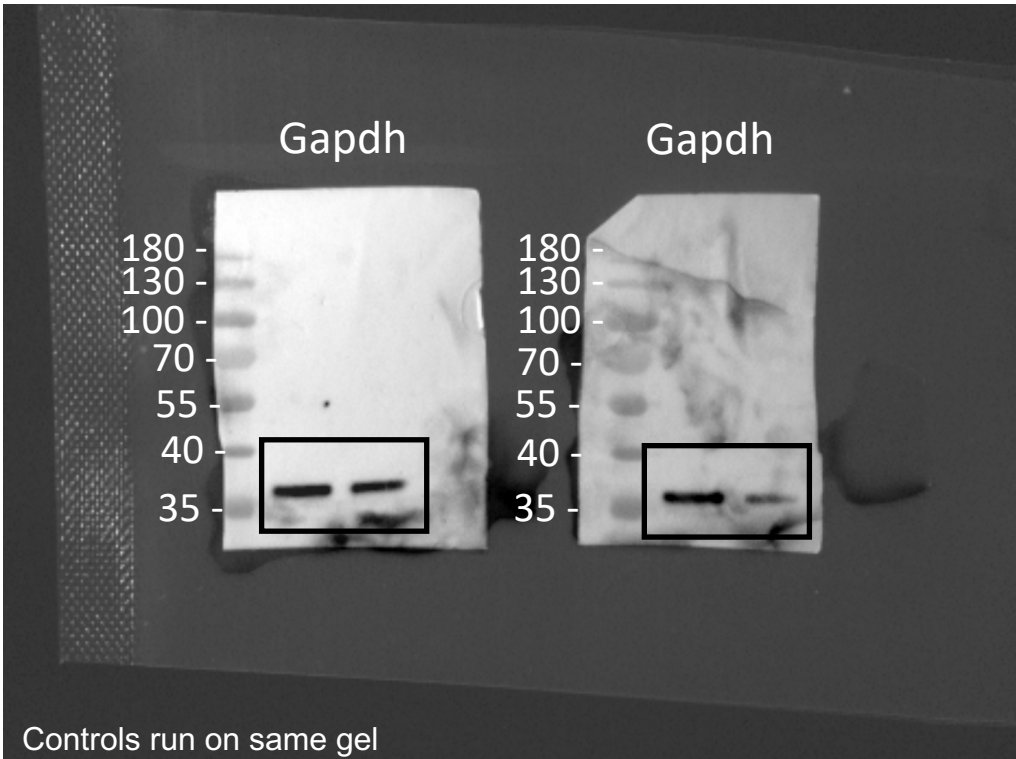

# Extended Data Figure 7a

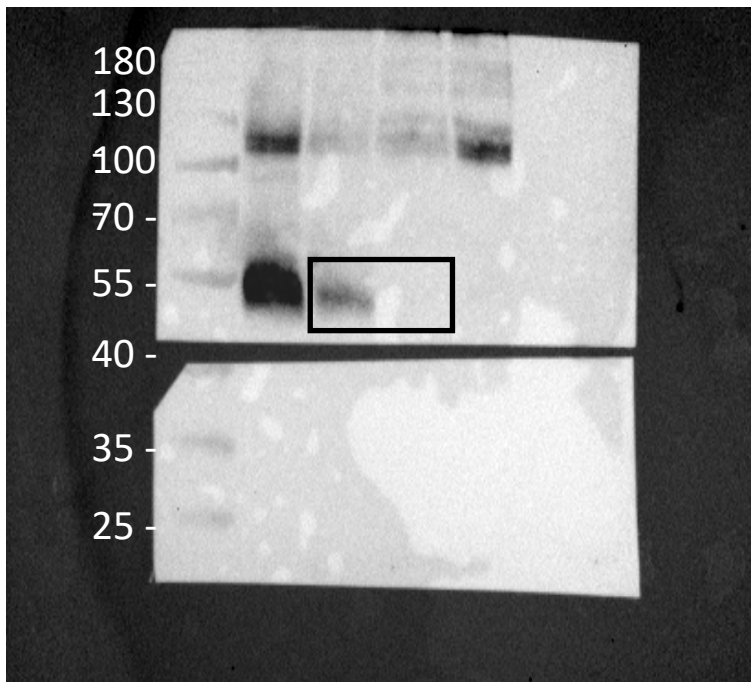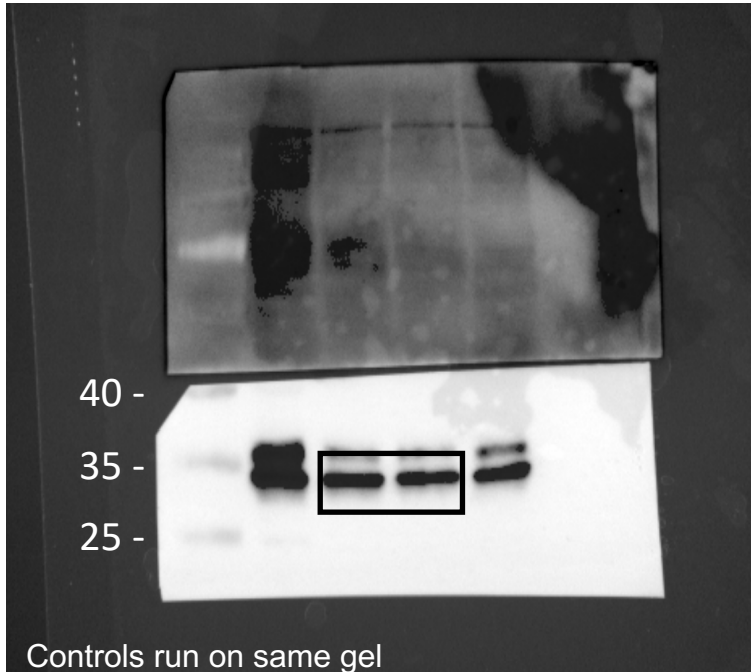

Controls run on same gel
